# Supplementary material for: Circulating Tumor DNA Is Associated with Response and Survival in Patients with Advanced Leiomyosarcoma
Source: PubMed Central journal article supplement — Clin Cancer Res. 2022 Feb 21;28(12):2579–86. doi: 10.1158/1078-0432.CCR-21-3951 (PMC9359745; doi:10.1158/1078-0432.ccr-21-3951), 2022-02-21
Supplement: ccr-21-3951_supplementary_figure_1_supps1.pdf [file ccr-21-3951_supplementary_figure_1_supps1.pdf]

# Supplementary Figure 1

A)

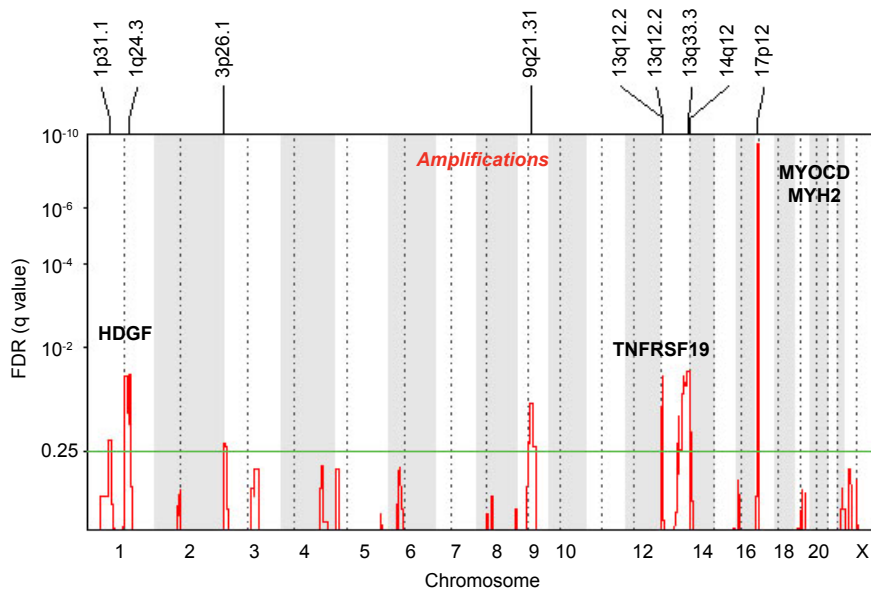

B)

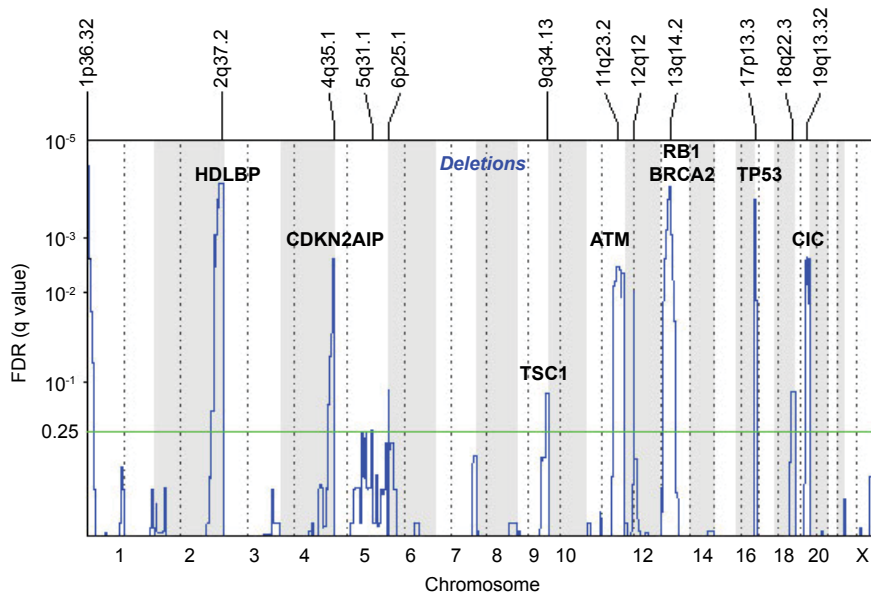

**Supplementary Figure 1: Recurrent copy number alterations in leiomyosarcoma.**

Significance plots of recurrent copy-number (A) gained and (B) deleted regions of the genome detected by ctDNA analysis in patients with advanced, unresectable LMS.
