# Supplementary material for: Circulating Tumor DNA Is Associated with Response and Survival in Patients with Advanced Leiomyosarcoma
Source: PubMed Central journal article supplement — Clin Cancer Res. 2022 Feb 21;28(12):2579–86. doi: 10.1158/1078-0432.CCR-21-3951 (PMC9359745; doi:10.1158/1078-0432.ccr-21-3951), 2022-02-21
Supplement: ccr-21-3951_supplementary_table_2_suppst2.pdf [file ccr-21-3951_supplementary_table_2_suppst2.pdf]

**Supplementary Table 2:** Association between detection of ctDNA and the baseline tumor size.  
**N** number, **SD** standard deviation.

|           | <b>Pre-treatment ctDNA positive<br/>(n=48)</b> |             | <b>Pre-treatment ctDNA negative<br/>(n=50)</b> |           | <b><i>p</i> value</b> |
|-----------|------------------------------------------------|-------------|------------------------------------------------|-----------|-----------------------|
|           | Median [Range]                                 | Mean (SD)   | Median [Range]                                 | Mean (SD) |                       |
| Size (cm) | 17.5 [2.2, 55]                                 | 17.8 (10.9) | 6 [1, 25.9]                                    | 8.1 (6.5) | <0.001                |
