# Supplementary material for: Circulating Tumor DNA Is Associated with Response and Survival in Patients with Advanced Leiomyosarcoma
Source: PubMed Central journal article supplement — Clin Cancer Res. 2022 Feb 21;28(12):2579–86. doi: 10.1158/1078-0432.CCR-21-3951 (PMC9359745; doi:10.1158/1078-0432.ccr-21-3951), 2022-02-21
Supplement: ccr-21-3951_supplementary_table_3_suppst3.pdf [file ccr-21-3951_supplementary_table_3_suppst3.pdf]

**Supplementary Table 3:** ctDNA levels are associated with objective response. **N** number, **SD** standard deviation.

|                          | No response |                |               | Response |                |             | <i>p</i> value |
|--------------------------|-------------|----------------|---------------|----------|----------------|-------------|----------------|
|                          | N           | Median [Range] | Mean (SD)     | N        | Median [Range] | Mean (SD)   |                |
| Pre-treatment ctDNA (%)  | 70          | 4.7 [0, 79]    | 13.77 (18.85) | 23       | 0 [0, 22]      | 2.32 (5.54) | 0.002          |
| Post-treatment ctDNA (%) | 49          | 0 [0, 33]      | 4.06 (7.99)   | 19       | 0 [0. 0]       | 0 (0)       | 0.004          |
