# Supplementary material for: Circulating Tumor DNA Is Associated with Response and Survival in Patients with Advanced Leiomyosarcoma
Source: PubMed Central journal article supplement — Clin Cancer Res. 2022 Feb 21;28(12):2579–86. doi: 10.1158/1078-0432.CCR-21-3951 (PMC9359745; doi:10.1158/1078-0432.ccr-21-3951), 2022-02-21
Supplement: ccr-21-3951_supplementary_table_4_suppst4.pdf [file ccr-21-3951_supplementary_table_4_suppst4.pdf]

**Supplementary Table 4:** Cox proportions-hazard model of the association between the indicated gene alteration with overall survival

| <b>Gene alteration</b> | <b>HR</b> | <b>95% CI</b> | <b><i>p</i> value</b> |
|------------------------|-----------|---------------|-----------------------|
| <i>MYOCD</i> gain      | 1.07      | 0.58 – 1.95   | 0.83                  |
| <i>MYC</i> gain        | 1.94      | 1.06 – 3.56   | 0.03                  |
| <i>RBI</i> loss        | 0.93      | 0.46 – 1.89   | 0.84                  |
| <i>TP53</i> loss       | 0.93      | 0.51 – 1.72   | 0.83                  |
| <i>PTEN</i> loss       | 0.83      | 0.44 – 1.57   | 0.57                  |
