# Supplementary material for: Circulating Tumor DNA Is Associated with Response and Survival in Patients with Advanced Leiomyosarcoma
Source: PubMed Central journal article supplement — Clin Cancer Res. 2022 Feb 21;28(12):2579–86. doi: 10.1158/1078-0432.CCR-21-3951 (PMC9359745; doi:10.1158/1078-0432.ccr-21-3951), 2022-02-21
Supplement: ccr-21-3951_supplementary_table_5_suppst5.pdf [file ccr-21-3951_supplementary_table_5_suppst5.pdf]

**Supplementary Table 5:** Cox proportions-hazard model of the association between the indicated gene alteration with progressive free survival

| <b>Gene alteration</b> | <b>HR</b> | <b>95% CI</b> | <b><i>p</i> value</b> |
|------------------------|-----------|---------------|-----------------------|
| <i>MYOCD</i> gain      | 1.25      | 0.68 – 2.29   | 0.47                  |
| <i>MYC</i> gain        | 1.1       | 0.61 – 1.98   | 0.75                  |
| <i>RBI</i> loss        | 1.59      | 0.78 – 3.24   | 0.2                   |
| <i>TP53</i> loss       | 1.22      | 0.66 – 2.26   | 0.53                  |
| <i>PTEN</i> loss       | 2.05      | 1.07 – 3.92   | 0.03                  |
